# Supplementary material for: Clinical and economic evaluation of a proteomic biomarker preterm birth risk predictor: Cost-effectiveness modeling of prenatal interventions applied to predicted higher-risk pregnancies within a large and diverse cohort
Source: bioRxiv or medRxiv preprint supplement (doi:10.1101/2021.09.08.21262940), 2022-10-05
Supplement: Supplementary file [file media-1.pdf]

**Supplemental Table 1 Probability of neonatal morbidity and mortality level indexed by week of gestation.**

| GA at birth (week) | Level 1 (mild) | Level 2 (moderate) | Level 3 (severe) | Level 4 (death) |
|--------------------|----------------|--------------------|------------------|-----------------|
| 23                 | 0.0%           | 0.0%               | 33.0%            | 67.0%           |
| 24                 | 0.0%           | 0.0%               | 58.9%            | 41.1%           |
| 25                 | 0.0%           | 0.0%               | 77.4%            | 22.6%           |
| 26                 | 0.0%           | 0.0%               | 80.8%            | 19.2%           |
| 27                 | 0.0%           | 0.0%               | 84.0%            | 16.0%           |
| 28                 | 0.0%           | 0.0%               | 86.0%            | 14.0%           |
| 29                 | 0.0%           | 0.0%               | 88.0%            | 12.0%           |
| 30                 | 0.0%           | 0.0%               | 89.4%            | 10.6%           |
| 31                 | 0.0%           | 5.9%               | 88.2%            | 5.9%            |
| 32                 | 0.0%           | 48.4%              | 47.6%            | 4.0%            |
| 33                 | 0.0%           | 49.7%              | 47.1%            | 3.3%            |
| 34                 | 3.9%           | 70.6%              | 23.5%            | 2.0%            |
| 35                 | 42.1%          | 42.1%              | 14.0%            | 1.8%            |
| 36                 | 76.4%          | 18.0%              | 4.5%             | 1.1%            |
| 37                 | 90.9%          | 7.9%               | 1.0%             | 0.3%            |
| 38                 | 94.7%          | 4.4%               | 0.7%             | 0.2%            |
| 39                 | 94.5%          | 4.7%               | 0.7%             | 0.1%            |
| 40                 | 98.1%          | 1.7%               | 0.3%             | 0.0%            |
| 41                 | 96.1%          | 2.5%               | 1.3%             | 0.1%            |
| 42                 | 96.1%          | 2.5%               | 1.3%             | 0.1%            |

Proportions of each level of neonatal morbidity and mortality in each week of GA at birth were derived from TREETOP observations, with smoothing.
